# Supplementary material
Source: PubMed Central journal article supplement (PMC5939375)
Supplement: NIHMS960258-supplement-Supporting_info.pdf [file NIHMS960258-supplement-Supporting_info.pdf]

## Supporting Information

### **Deprotonations in the Reaction of Flavin-Dependent Thymidylate Synthase**

Frederick W. Stull<sup>†</sup>, Steffen M. Bernard<sup>†</sup>, Aparna Sapra<sup>‡</sup>, Janet L. Smith<sup>†,‡,§</sup>, Erik R.  
P. Zuiderweg<sup>‡</sup>, & Bruce A. Palfey<sup>\*,†,‡</sup>

<sup>†</sup>Program in Chemical Biology, University of Michigan, Ann Arbor, Michigan 48109,  
USA

<sup>‡</sup>Department of Biological Chemistry, University of Michigan, Ann Arbor, Michigan  
48109, USA

<sup>§</sup>Life Sciences Institute, University of Michigan, Ann Arbor, Michigan 48109, USA

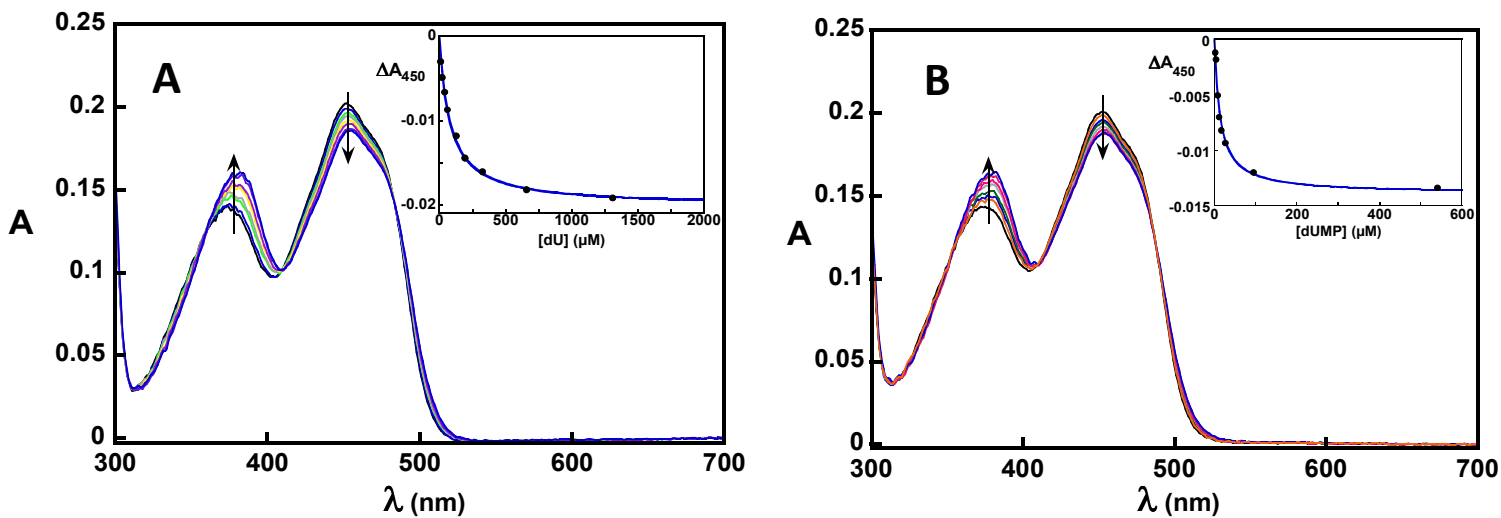

SI Figure 1. Spectrophotometric titrations of WT FdTS with dU (a) and R90A FdTS with dUMP (b) in 0.1 M Tris-HCl, pH 8 at 25 °C. The insets show the change in absorbance as a function of ligand concentration. Fitting to a square hyperbola gives a  $K_d$  of 78  $\mu\text{M}$  for dU binding to WT FdTS and 14  $\mu\text{M}$  for dUMP binding to R90A FdTS.

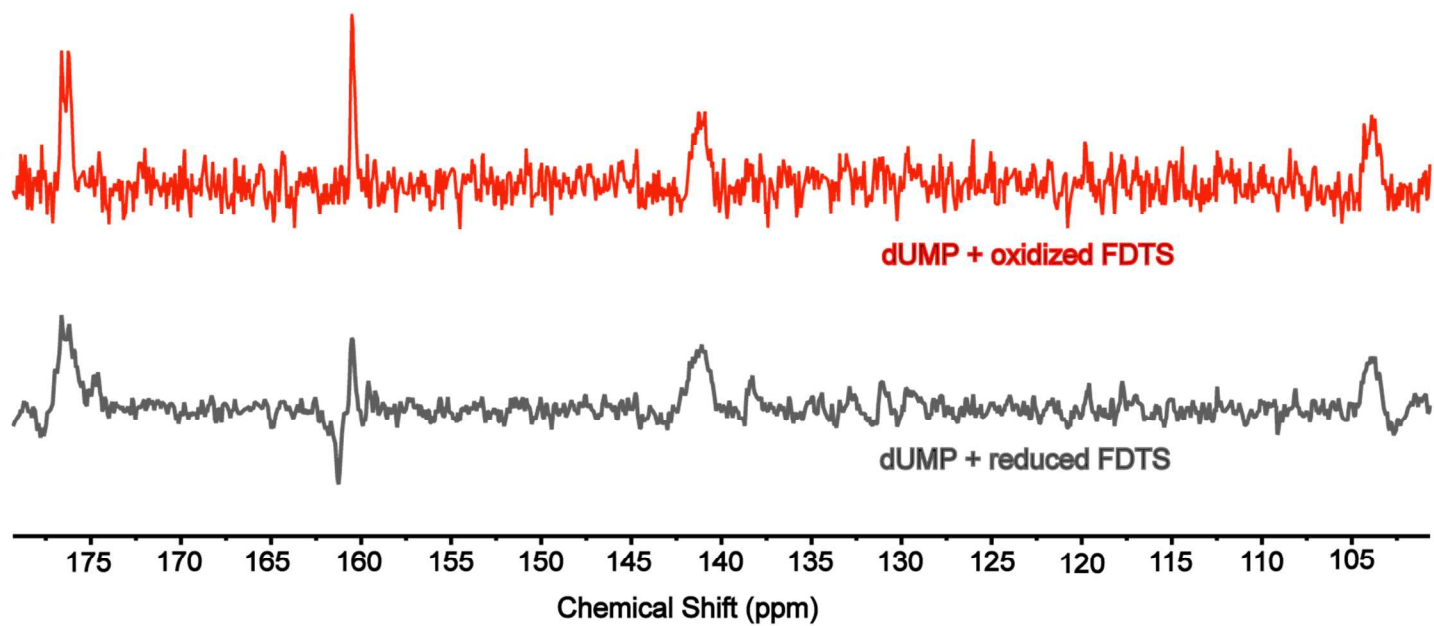

SI Figure 2. The <sup>13</sup>C-NMR spectra of uracil carbons of dUMP bound to oxidized or reduced WT FDTS at 45 °C. The <sup>13</sup>C chemical shifts were nearly identical when the flavin was oxidized or reduced.

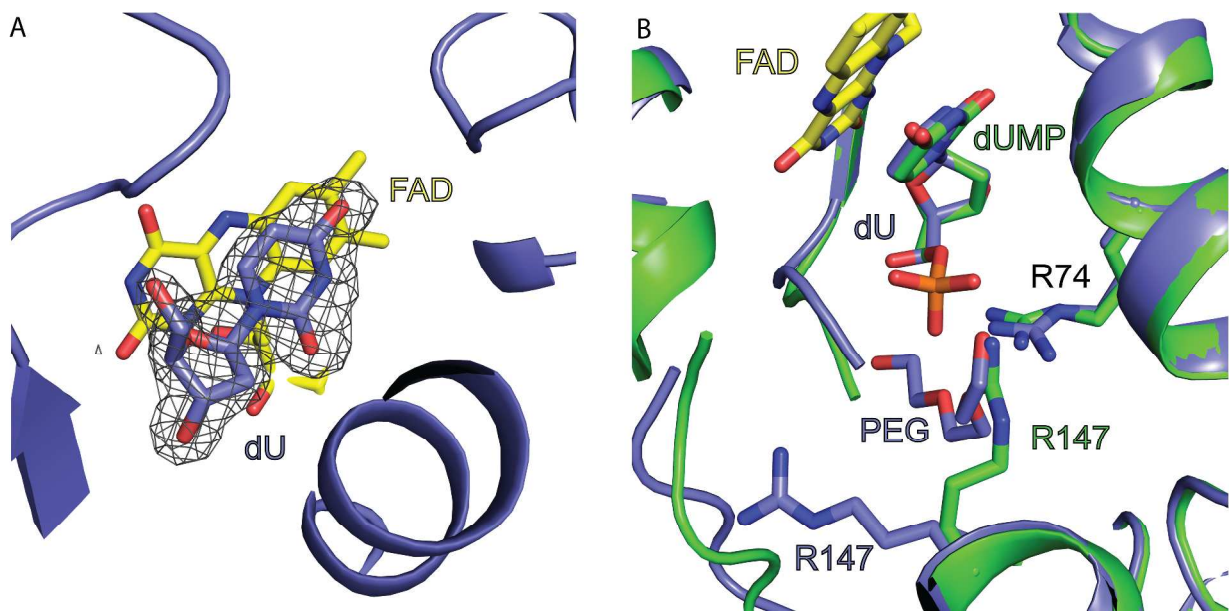

SI Figure 3. Deoxyuridine binding to FDTS. A. The 1.93 Å  $F_o - F_c$  omit map contoured at  $3\sigma$  shows clear density for the dU ligand. B. Overlay of dUMP-WT FDTS and dU-WT FDTS structures. R147 – which forms a salt bridge with the phosphate of dUMP – is in a different conformation in the dU-WT FDTS structure. A PEG molecule from the crystallization solution occupies the vacant space. The dUMP-WT FDTS complex is shown in green, dU-WT FDTS is shown in blue, and dUMP and dU are shown as sticks. A single copy of FAD is shown in yellow sticks.

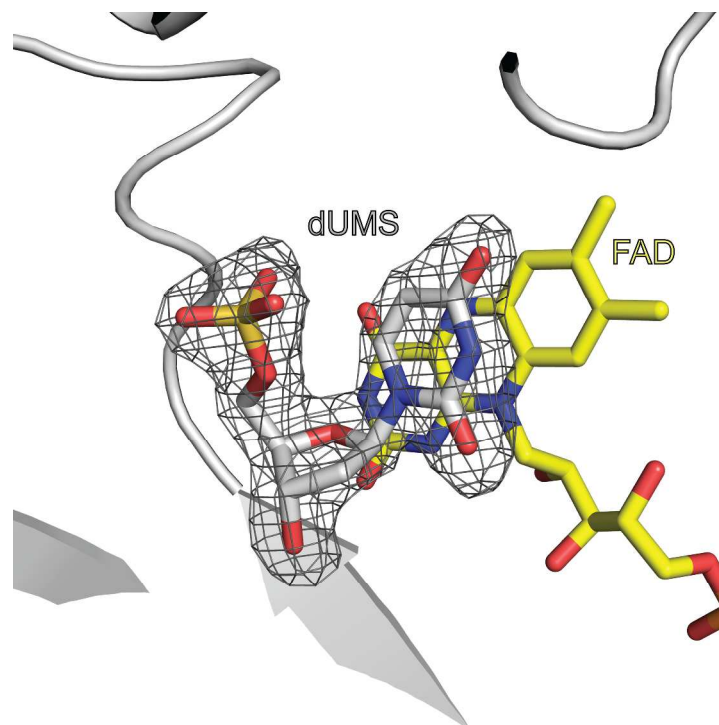

SI Figure 4. dUMS binding to FDTs. The  $1.95 \text{ \AA}$   $F_O-F_C$  omit map contoured at  $3 \sigma$  shows clear density for the dUMS ligand. The dUMS ligand is shown in grey sticks and FAD is shown in yellow sticks.

SI Table 1: Crystallographic summary

| Crystal Contents                    | ThyX R90A-FAD<br>dUMP        | ThyX R174A-FAD<br>dUMP | ThyX-FAD<br>dU    | ThyX-FAD<br>dUMS  |
|-------------------------------------|------------------------------|------------------------|-------------------|-------------------|
| <b>Diffraction Data</b>             |                              |                        |                   |                   |
| Space group                         | $P2_12_12_1$                 | $P2_12_12_1$           | $P2_12_12_1$      | $I4_122$          |
| Cell (Å)                            | 54.1 116.2 141.0             | 54.1 115.9 141.1       | 54.2 116.1 141.9  | 109.7 109.7 119.9 |
| $d_{\min}$ (Å)                      | 1.9 (1.97-1.90) <sup>1</sup> | 2.00 (2.11-2.00)       | 1.93 (2.02- 1.93) | 1.95 (2.06-1.95)  |
| Average $I/\sigma_I$                | 22.9 (2.3)                   | 8.7 (2.4)              | 22.8 (2.5)        | 20.4 (2.6)        |
| $R_{\text{sym}}$                    | 0.073 (0.856)                | 0.115 (0.682)          | 0.094 (0.897)     | 0.118 (1.096)     |
| $CC_{1/2}$                          |                              |                        |                   | 99.9 (82.5)       |
| Multiplicity                        | 6.6 (5.9)                    | 6.0 (6.1)              | 7.6 (6.8)         | 14.6 (14.2)       |
| Completeness                        | 99.5 (99.6)                  | 90.7 (86.0)            | 98.1 (96.9)       | 99.7 (98.1)       |
| No. of unique reflections           | 70476                        | 54863                  | 67137             | 27043             |
| <b>Refinement</b>                   |                              |                        |                   |                   |
| Data Range (Å)                      | 89.68 -1.90                  | 89.54 - 2.00           | 89.86 - 1.93      | 80.92-1.95        |
| Reflections                         | 66829                        | 52046                  | 62459             | 25671             |
| $R_{\text{work}}/R_{\text{free}}$   | 0.178 / 0.211                | 0.183 / 0.217          | 0.170 / 0.202     | 0.162 / 0.200     |
| RMSD bonds (Å)                      | 0.010                        | 0.010                  | 0.010             | 0.009             |
| RMSD angles (°)                     | 1.48                         | 1.49                   | 1.46              | 1.37              |
| Ramachandran (%)                    |                              |                        |                   |                   |
| Allowed                             | 100                          | 100                    | 100               | 100               |
| Outliers                            | 0                            | 0                      | 0                 | 0                 |
| Average B-factors (Å <sup>2</sup> ) |                              |                        |                   |                   |
| Protein                             | 37.1                         | 34.8                   | 39.3              | 22.8              |
| Ligand                              | 25.9                         | 25.6                   | 36.8              | 32.5              |
| Water                               | 38.0                         | 37.3                   | 40.4              | 37.8              |

<sup>1</sup> Values in parentheses refer to the outermost shell of data.
